## *Dexmedetomidine, an $\alpha_2$ -Adrenoceptor Agonist, Reduces Anesthetic Requirements for Patients Undergoing Minor Gynecologic Surgery*

Riku Aantaa, M.D.,\* Jussi Kanto, M.D.,† Mika Scheinin, M.D.,‡ Antero Kallio, M.D.,§ Harry Scheinin, M.D.¶

The effects of dexmedetomidine, an  $\alpha_2$ -adrenoceptor agonist, on vigilance, thiopental anesthetic requirements, and the hemodynamic, catecholamine, and hormonal responses to surgery were investigated in healthy (ASA physical status 1) women scheduled for dilatation and curettage (D & C) of the uterus. Fifteen minutes before induction they received single iv doses of either dexmedetomidine (0.5  $\mu\text{g}/\text{kg}$ ;  $n = 19$ ) or saline ( $n = 20$ ) in a double-blind fashion. Anesthesia was induced with thiopental and maintained with  $\text{N}_2\text{O}/\text{O}_2$  (70/30%) and thiopental. Dexmedetomidine was well tolerated and no serious drug-related subjective side-effects or adverse events were observed. The most prominent subjective effects were fatigue and decreased salivation. The total amount of thiopental needed to perform D & C of the uterus was reduced approximately 30% (from  $456 \pm 141$  mg [mean  $\pm$  SD] after saline to  $316 \pm 79$  mg after dexmedetomidine). This was mostly due to a smaller induction dose in the group receiving dexmedetomidine. Dexmedetomidine appeared to improve the recovery from anesthesia as measured by visual analogue scales (VAS) on fatigue and nausea. The plasma concentration of norepinephrine was decreased by 56% after dexmedetomidine implying decreased sympathetic nervous activity. Systolic and diastolic blood pressure were moderately reduced after dexmedetomidine administration. The authors conclude that dexmedetomidine preanesthetic medication decreases thiopental anesthetic requirements and improves the recuperation from anesthesia with no serious hemodynamic or other adverse effects. Further studies in patients undergoing more stressful surgery are indicated. (Key words: Anesthetics, intravenous: thiopental. Premedication,  $\alpha_2$ -adrenoceptor agonists: dexmedetomidine. Sympathetic nervous system,  $\alpha_2$ -adrenoceptor agonists: dexmedetomidine: 4(5)-(1-(2,3-dimethylphenyl)ethyl)-imidazole.)

CLONIDINE, the prototypical  $\alpha_2$ -adrenoceptor agonist widely employed as an antihypertensive agent, has been shown to reduce volatile anesthetic requirements.<sup>1,2</sup> Clo-

nidine attenuates sympathoadrenal responses to painful (tracheal intubation or surgery<sup>2,3</sup>) and other stimuli (*e.g.*, sodium-nitroprusside-induced hypotension<sup>4</sup>).  $\alpha_2$ -Adrenoceptor agonists activate presynaptic  $\alpha_2$ -adrenoceptors, thus inhibiting release of norepinephrine from sympathetic nerve endings.<sup>5</sup> The exact mechanism of the reduction of the anesthetic requirements is unknown but it is presumed that the decrease is caused by actions on both pre- and postsynaptic  $\alpha_2$ -adrenoceptors in the central nervous system.<sup>6,7</sup>

Dexmedetomidine, the pharmacologically active d-isomer of medetomidine, is a highly selective, specific, and potent  $\alpha_2$ -adrenoceptor agonist.<sup>6,8</sup> Medetomidine has a considerably higher  $\alpha_2/\alpha_1$ -selectivity ratio than clonidine in receptor-binding experiments (1,620 *vs.* 220 in rat brain membranes<sup>9</sup>), and compared with the latter drug, it has more efficacy as an  $\alpha_2$ -adrenoceptor agonist in most pharmacologic models tested so far.<sup>9</sup> Dexmedetomidine has been shown to effectively reduce volatile anesthetic requirements in experimental animals as measured by MAC or even to be a complete anesthetic by itself in sufficiently high doses in certain animal studies.<sup>7,10</sup> The aim of this study was to investigate the sedative, hemodynamic, anesthetic-reducing, and hormonal effects of dexmedetomidine as preanesthetic medication before dilatation and curettage (D & C) of the uterus in patients receiving thiopental/nitrous oxide anesthesia.

### Materials and Methods

Forty healthy (ASA physical status 1) nonpregnant women scheduled for D & C were included in this study (age  $44.2 \pm 6.2$  yr [mean  $\pm$  SD], weight  $63.5 \pm 9.2$  kg) (table 1). The patients were admitted to the hospital only for gynecologic reasons (abnormal bleeding) and none received any medication. The study protocol was approved by the Ethics Committee of Turku University Hospital and the Finnish National Board of Health. Oral informed consent was obtained from each patient.

The patients were randomly allocated to receive intravenously either 0.5  $\mu\text{g}/\text{kg}$  of dexmedetomidine ( $n = 19$ ; one patient was excluded due to an attack of migraine after randomization but prior to treatment) or an equal volume (1–2 ml) of saline ( $n = 20$ ). The study was conducted in a double-blind fashion.

\* Resident in Anesthesia, Department of Anesthesiology, Turku University Hospital.

† Associate Professor, Department of Anesthesiology, Turku University Hospital.

‡ Assistant Professor, Department of Pharmacology, University of Turku.

§ Research Manager, Farnos Group Research Center, Turku.

¶ Medical Director, Farnos Group Research Center, Turku.

Received from the Department of Anesthesiology, Turku University Hospital, Kiinamyllynkatu 4-8, SF-20520 Turku, Finland; Department of Pharmacology, University of Turku, SF-20520 Turku, Finland; and Farnos Group Ltd, Research Center, P.O.B. 425, SF-20101 Turku, Finland. Accepted for publication March 7, 1990. Supported by Farnos Group Ltd, Turku, Finland. Presented in part at the Annual Meeting of the American Society of Anesthesiologists, New Orleans, Louisiana, October 1989.

Address reprint requests to Dr. Aantaa: Department of Anesthesiology, University of Turku, SF-20520 Turku, Finland.

TABLE 1. Patient and Operation Characteristics

| Drug            | Patient Number | Age (yr) | Weight (kg) | Duration of surgery (min) |
|-----------------|----------------|----------|-------------|---------------------------|
| Dexmedetomidine | 19             |          |             |                           |
| Mean            |                | 43.3     | 61.7        | 6.8                       |
| SD              |                | 5.1      | 9.6         | 3.5                       |
| Saline          | 20             |          |             |                           |
| Mean            |                | 45.1     | 65.3        | 7.6                       |
| SD              |                | 7.0      | 8.8         | 2.7                       |
| <i>t</i> test   |                |          |             |                           |
| <i>P</i>        |                | 0.37     | 0.23        | 0.45                      |

The patients entered the hospital 1 day before the scheduled surgery. After fasting overnight and at least 1 h of rest in the supine position the patients were transferred to the operating unit at least 30 min prior to D & C. The procedures were performed between 9 A.M. and noon in a quiet, dimly lit room with a constant light before and after D & C. Upon arrival in the operating unit, continuous monitoring of the electrocardiogram (ECG) and heart rate (HR), and noninvasive recording of systolic and diastolic blood pressure at 5-min intervals with an automated oscillometric device (Nippon Colin 203Y, Tokyo, Japan) were started. For reasons of safety the attending anesthesiologist was aware of the ECG, but not of blood pressure or the patients' side effect reports, which were recorded by a research nurse. An antecubital vein on the left arm was cannulated for administration of the pre-anesthetic medication and the anesthetic (thiopental, Hypnostan® 25mg/ml) as well as to collect blood samples. The cannula was kept patent with a diluted heparin solution. Blood samples (100 ml altogether) were collected 15 and 5 min prior to induction, at the end of surgery, and 30 and 60 min following recovery from anesthesia for determination of the concentrations of norepinephrine (NE), epinephrine (E), cortisol, human growth hormone (hGH), and prolactin (PRL).

Dexmedetomidine or saline was administered slowly (over 60 s) intravenously 15 min before induction of anesthesia. Anesthesia was induced with thiopental in increments of 25–50 mg at 15-s intervals and the induction dose (dose required to suppress the eye lid reflex) was noted.<sup>11</sup> Anesthesia was maintained with N<sub>2</sub>O/O<sub>2</sub> (70/30 %; fresh gas flow 9 l/min) using a modified Mapleson F (Jackson Reese) system. If spontaneous movement occurred, additional bolus doses of thiopental, 25 mg were given to produce a sufficient anesthesia. The time needed to regain consciousness (*i.e.*, when the patient opened her eyes at verbal command) after the termination of N<sub>2</sub>O was recorded.

After D & C and recovery from anesthesia, the patients were observed and tested for 1 h. Impairment of vigilance was objectively assessed with the Maddox wing and the

Critical flicker fusion test (CFF).<sup>12,13</sup> Visual analogue scales (VAS) were used to collect subjective data<sup>14</sup> concerning fear, anxiety, mental clouding, fatigue, dryness of mouth, nausea, headache, and pain. The patients were familiarized with the use of the Maddox wing and CFF apparatus as well as VAS on the day before the scheduled surgery. The subjects were urged to report any possibly drug-related subjective sensations, and a standardized side-effect questionnaire, including a question of intraoperative awareness, was repeated 15 and 5 min before D & C, and 10, 30, and 60 min following recovery from anesthesia.

Blood for the chemical determinations was collected into chilled polypropylene tubes with K<sub>2</sub> EDTA, which were stored in ice until centrifuged within 2 h at 0–4° C. The plasma samples were stored at –70° C until assayed.

Catecholamine concentrations in plasma were determined using high-performance liquid chromatography with coulometric electrochemical detection (HPLC-EC).<sup>15</sup> The reproducibility of the assay was tested using pooled plasma samples from previous clinical studies, and the resulting intra-assay coefficients of variation (CV) were less than 2% for NE, and approximately 10% for E in the relevant concentration ranges. All samples from one experimental session were analyzed in one assay.

The concentrations of cortisol, hGH, and PRL in plasma were analyzed using commercially available radioimmunoassay kits (SPECTRIA®, Farnos Diagnostica, Turku, Finland) with intra-assay CVs below 5% in the relevant concentration range for PRL and cortisol and below 8% for hGH.

#### STATISTICAL ANALYSIS

The statistical analysis was performed using analysis of variance (ANOVA) for repeated measurements with one between factor (drug) and one within factor (time). The ANOVAs were performed over two periods separated by the surgical procedure. Demographic data and thiopental doses were analyzed with Student's *t* test. A *P* value of <0.05 was considered statistically significant. The results in the text are given as means ± SD.

#### Results

The two groups were similar in weight and age and duration of surgery (table 1). Dexmedetomidine was well tolerated and no serious hemodynamic or other possibly drug-related adverse events were observed. None of the patients experienced awareness under anesthesia.

Ten minutes after dexmedetomidine administration, patients experienced sedation and dryness of mouth as measured by VAS (*P* = 0.0031 and *P* = 0.0037, respectively; figs. 1 A and B). There was no difference between the two groups in mental clouding as measured by VAS before D & C (*P* = 0.14; fig. 1 A). The objective evaluation

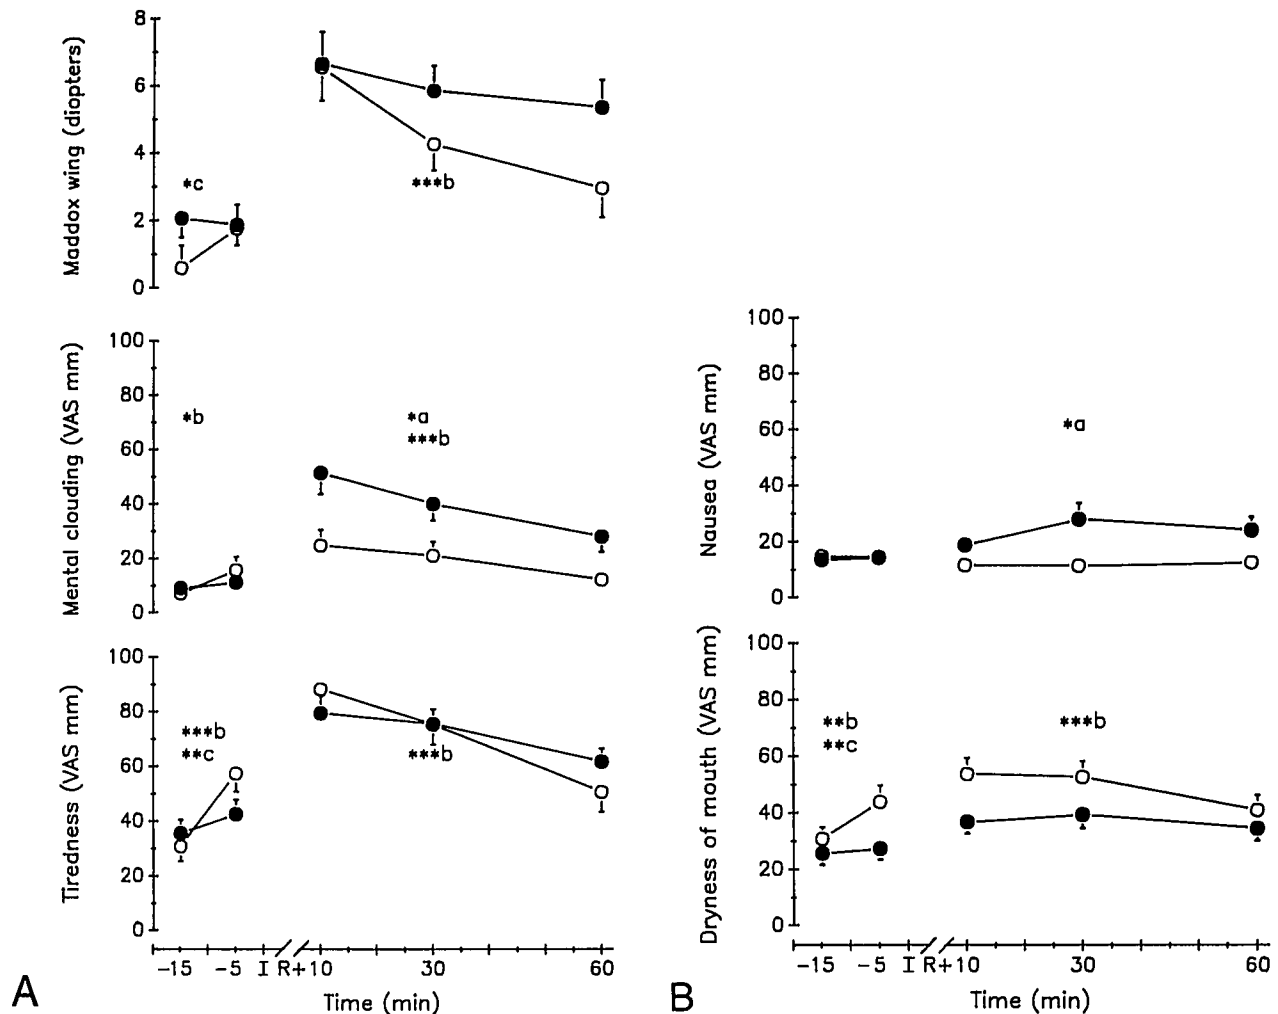

FIG. 1. A Mean values ( $\pm$ SEM) for subjectively estimated tiredness, mental clouding (as mm on a 100-mm-long visual analogue scale: 0 = fully alert or no confusion; 100 = asleep or very confused), and the Maddox wing readings (in diopters). B Mean values for subjectively estimated dryness of mouth and nausea (0 = normal salivation or no nausea; 100 = very dry mouth or strong nausea). Dexmedetomidine 0.5  $\mu$ g/kg ( $\circ$ ) and saline ( $\bullet$ ). I = induction of anesthesia. R = recovery from anesthesia. a = drug effect. b = time effect. c = drug  $\times$  time interaction (ANOVA). \* $P$  < 0.05. \*\* $P$  < 0.001. \*\*\* $P$  < 0.0001.

of vigilance with the Maddox wing showed a statistically significant increase in exophoria (diopter readings) after dexmedetomidine administration ( $P$  = 0.016; fig. 1 A).

The induction dose of thiopental was decreased 37% by dexmedetomidine:  $329 \pm 100$  mg after saline and  $207 \pm 49$  mg after dexmedetomidine ( $P$  < 0.0001). The mean maintenance dose of thiopental was not significantly influenced by preanesthetic medication ( $128 \pm 110$  mg after saline and  $109 \pm 66$  mg after dexmedetomidine;  $P$  = 0.53). The total dose of thiopental needed to maintain anesthesia for D & C was reduced approximately 31% by dexmedetomidine ( $456 \pm 141$  mg after saline and  $316 \pm 79$  mg after dexmedetomidine;  $P$  = 0.0005).

There was an average decrease of 10% in systolic blood pressure after dexmedetomidine administration ( $P$  < 0.0001; fig. 2). There was some variation of systolic

blood pressure during D & C, but it was consistently lower in the dexmedetomidine group than in the saline group until the end of the follow-up ( $P$  = 0.038).

Dexmedetomidine administration caused an approximately 9% decline in diastolic blood pressure and patients in the dexmedetomidine group had lower diastolic blood pressure until the end of the procedure ( $P$  < 0.0001; fig. 2). After recovery the difference between the groups was no longer statistically significant ( $P$  = 0.066).

No statistically significant differences were seen in HR between the two pretreatment groups before, during, or after the surgical procedure (fig. 2).

Plasma NE concentrations were decreased by 56% on the average ( $P$  < 0.0001; fig. 3 A) after dexmedetomidine administration. The D & C caused a small increase in the NE concentrations in both groups but the values did not

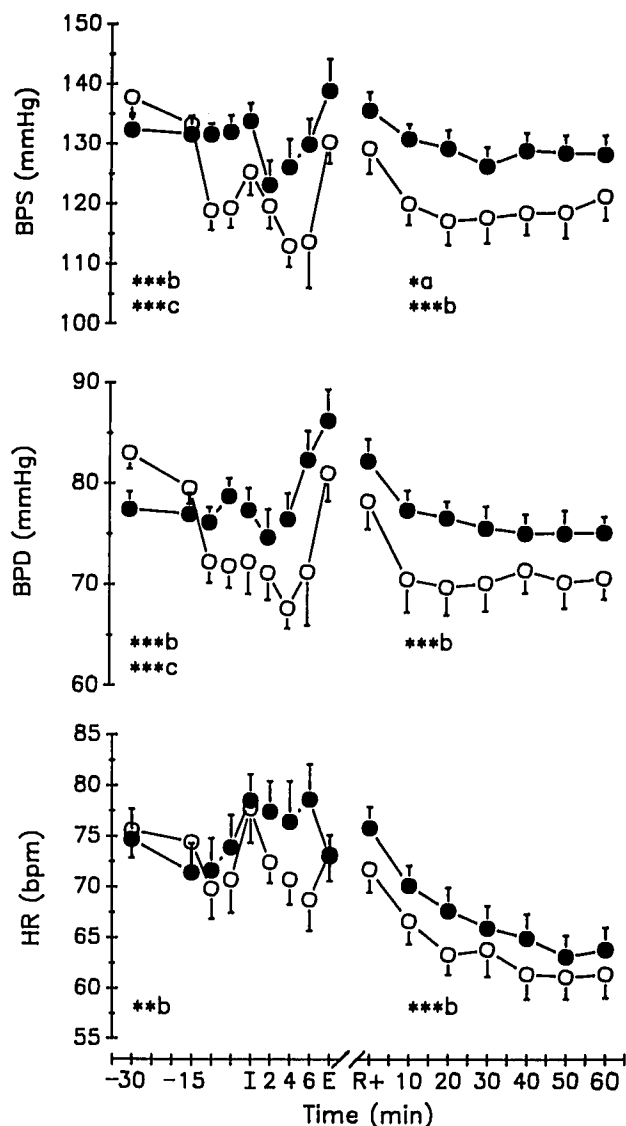

FIG. 2. Mean values ( $\pm$ SEM) of systolic (BPS) and diastolic (BPD) blood pressure and heart rate. Dexmedetomidine  $0.5 \mu\text{g}/\text{kg}$  (O) and saline (●). I = induction of anesthesia. E = end of the operation. R = recovery from anesthesia. a = drug effect. b = time effect. c = drug  $\times$  time interaction (ANOVA). \* $P < 0.05$ . \*\* $P < 0.001$ . \*\*\* $P < 0.0001$ . Note the different time scale during anesthesia.

reach the baseline in the dexmedetomidine group. The difference between the groups lasted until the end of the experiment ( $P = 0.035$ ; fig. 3 A). There were no consistent changes in the plasma E concentrations in either group (data not shown).

After D & C plasma hGH concentrations were increased more in the dexmedetomidine than in the saline group ( $P = 0.0001$ ; fig. 3 A). The plasma PRL and cortisol concentrations were equally increased in both groups ( $P = 0.40$  and  $P = 0.85$ , respectively; fig. 3 B).

The mean time required to regain consciousness was  $8.8 \pm 10.6$  min in the dexmedetomidine group and 6.0

$\pm 5.4$  min in the saline group ( $P = 0.30$ ). The patients in the dexmedetomidine group reported less mental clouding ( $P = 0.011$ ) but not significantly less sedation after anesthesia and D & C than those in the saline group ( $P = 0.081$ ; fig. 1 A). The Maddox wing (fig. 1 A) and CFF (data not shown) did not reveal significant differences between the groups in postoperative vigilance.

There was significantly less nausea ( $P = 0.036$ ; fig. 1 B) in the dexmedetomidine group than in the saline group after the recovery as measured by VAS. There were no significant differences in the experience of headache, pain, fear, or anxiety (data not shown). One patient in the dexmedetomidine group required analgesic supplementation (Oxycodone 5 mg iv and 5 mg im).

## Discussion

Dexmedetomidine was well tolerated and no serious side effects or adverse reactions occurred in the present study. Blood pressure was modestly decreased by the dose of dexmedetomidine used but heart rates were not significantly different between the groups. These hemodynamic effects are in accordance with previous studies in healthy male volunteers.<sup>16,17</sup> The most prominent subjective effects were fatigue and dry mouth. The objective evaluation of the level of vigilance with the Maddox wing supported the subjective estimates on fatigue.

The most striking finding of the present study was the reduction (about 30%) in the amount of thiopental needed for D & C. A decrease in central noradrenergic neurotransmission is associated with a reduction in anesthetic requirements as reflected by a lower MAC.<sup>18-20</sup> We measured the NE concentration in venous blood as an index of peripheral sympathetic nervous system activity. The plasma NE concentration was markedly reduced in patients receiving dexmedetomidine. This decrement in neuronal NE release may explain in part the reduction in thiopental requirements, although recent animal studies have suggested a more direct effect of dexmedetomidine on the molecular mechanisms mediating the anesthetic response.<sup>6,7</sup>

A possible limitation of this study may have been the use of subjective criteria in determining the thiopental dose for each patient. Although the recording of blood pressure and subjective drug effects was carried out by a research nurse and not communicated to the anesthesiologist in charge of the patient, knowledge of the ECG (as described before) could have influenced the amount of thiopental administered. HR was indeed reduced in some patients, thereby unblinding the clinician administering the anesthetic. However, this did probably not influence the results, as the mean heart rates were not significantly different between the groups, and as there was no significant correlation between the reduction in HR after dexmedetomidine and the induction dose of thio-

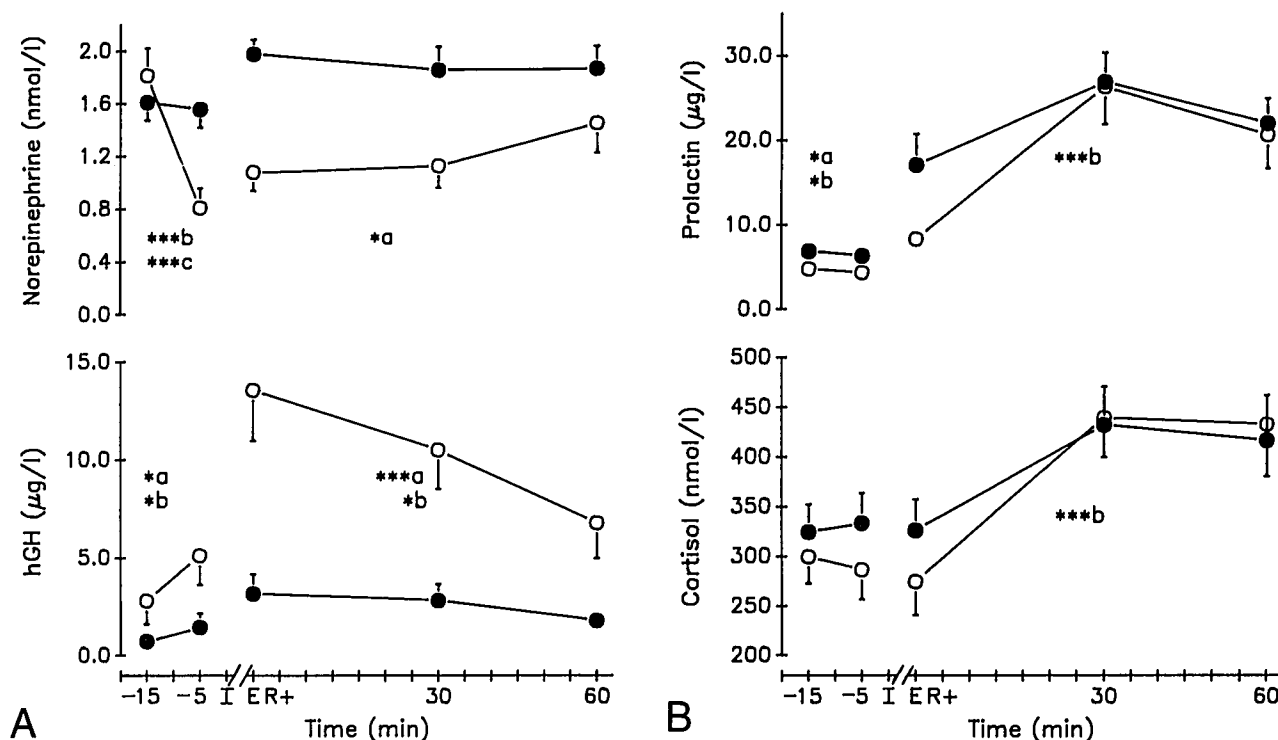

FIG. 3. *A* Mean ( $\pm$ SEM) plasma norepinephrine and hGH concentrations. *B* Mean ( $\pm$ SEM) plasma prolactin and cortisol concentrations. Dexmedetomidine 0.5  $\mu$ g/kg (○) and saline (●). I = induction of anesthesia. R = recovery from anesthesia. E = end of the operation. a = drug effect. b = time effect. c = drug  $\times$  time interaction (ANOVA). \* $P$  < 0.05. \*\* $P$  < 0.001. \*\*\* $P$  < 0.0001.

pental ( $r = -0.28$ ). Further studies using objective criteria for determination of the anesthetic requirement and a more effective blinding arrangement are needed to confirm our results.

The maintenance dose of thiopental needed for D & C was not similarly reduced by dexmedetomidine. Although dexmedetomidine exhibits anesthetic properties, as implied by the decreased induction requirements of thiopental, it may not possess very potent analgesic activity at the dose level employed by us. Thus, when the surgery caused pain, additional thiopental was needed to maintain a sufficiently deep level of anesthesia.

Attenuation of sympathoadrenal responses, as previously reported after clonidine during more stressful surgery,<sup>21</sup> was not, however, clearly seen perhaps due to the relatively minor stress induced by the procedure. This may have been caused partly by the sampling of peripheral venous plasma in this study. It is well known that small changes in catecholamine release are more accurately reflected in central venous blood samples.<sup>22</sup> All catecholamine values were in the normal physiologic range, and the small surgery-related increases were clinically insignificant. The catecholamine measurements, as well as the other stress hormone determinations, were here used as indicators of the pharmacologic mechanism of action of dexmedetomidine and its influence on the endocrine response to anesthesia and surgery. Hormone responses

have been widely used for this purpose in premedication studies,<sup>23</sup> and further studies with dexmedetomidine preceding more stressful procedures are required for the evaluation of the significance of the hormonal effects of dexmedetomidine in contrast to other anesthetic agents.

Clonidine and other  $\alpha_2$ -adrenoceptor agonists stimulate hGH release.<sup>24</sup> In the present study, dexmedetomidine increased the plasma hGH concentration. Medetomidine, the racemic mixture of two enantiomers, has been shown to increase plasma hGH concentrations as much as 10 to 20 times the baseline values for up to 2 h in healthy male volunteers after a single iv injection.<sup>16,25</sup> The small increase in plasma hGH concentrations in the saline group was probably induced by the modest stress related to anesthesia and D & C, and is in accord with previous findings.<sup>26</sup>

$\alpha_2$ -Adrenoceptor agonists do not directly influence cortisol secretion under basal conditions<sup>17,24</sup> and clonidine does not suppress the release of cortisol in response to anesthesia and surgery.<sup>3</sup> Similarly, plasma cortisol levels were not affected by dexmedetomidine. Thirty minutes after recovery there was a marked increase of the plasma cortisol concentration in both groups, a well-established response to anesthesia and surgery.<sup>23</sup>

Stress and surgery increase the release of prolactin.<sup>27</sup> In the present study the concentration of PRL in plasma increased at the end of the operation in both groups. This

was uninfluenced by dexmedetomidine pretreatment, which provides further support to the lack of involvement of  $\alpha_2$ -adrenoceptors in the regulation of PRL release, as previously reported in resting male volunteers.<sup>25,28</sup>

Dexmedetomidine seemed to augment the recovery from anesthesia, although the rate of the recovery was not affected as measured by Maddox wing, CFF, or the time needed to regain consciousness. Patients in the dexmedetomidine group experienced less postoperative mental clouding and less nausea than those in the saline group. This is most likely due to the decreased thiopental requirements because nausea is a common side effect of thiopental in clinical practice.<sup>29</sup> The present study cannot exclude the possibility that dexmedetomidine has antiemetic properties.

In summary, dexmedetomidine as preanesthetic medication decreased thiopental anesthetic requirements and improved the recuperation from anesthesia with no serious hemodynamic or other adverse effects. Further studies with dexmedetomidine as an adjuvant to anesthesia for more stressful surgery are indicated.

The authors wish to thank Mr. Juhani Tuominen, Ph. Lic. for performing the statistical analysis.

## REFERENCES

- Kaukinen S, Pyykkö K: The potentiation of halothane anaesthesia by clonidine. *Acta Anaesthesiol Scand* 23:107-111, 1979
- Longnecker DE: Alpine anesthesia: Can pretreatment with clonidine decrease the peaks and valleys? (editorial) *ANESTHESIOLOGY* 67:1-2, 1987
- Pouttu J, Scheinin B, Rosenberg PH, Viinamäki O, Scheinin M: Oral premedication with clonidine: effects on stress responses during general anaesthesia. *Acta Anaesthesiol Scand* 31:730-734, 1987
- Bloor BC, Finander LS, Flacke WE, Van Etten A: Effect of clonidine on sympathoadrenal response during sodium nitroprusside hypotension. *Anesth Analg* 65:469-474, 1986
- Langer SZ: Presynaptic regulation of the release of catecholamines. *Pharmacol Rev* 32:337-362, 1980
- Vickery RG, Sheridan BC, Segal IS, Maze M: Anesthetic and hemodynamic effects of the stereoisomers of medetomidine, an  $\alpha_2$ -adrenergic agonist, in halothane-anesthetized dogs. *Anesth Analg* 67:611-615, 1988
- Segal IS, Vickery RG, Walton JK, Doze VA, Maze M: Dexmedetomidine diminishes halothane anesthetic requirements in rats through postsynaptic  $\alpha_2$  adrenergic receptor. *ANESTHESIOLOGY* 69:818-823, 1988
- Scheinin H, Virtanen R, MacDonald E, Lammintausta R, Scheinin M: Medetomidine—A novel  $\alpha_2$ -adrenoceptor agonist: A review of its pharmacodynamic effects. *Prog Neuropsychopharmacol Biol Psychiatry*, 13:635-651, 1989
- Virtanen R, Savola JM, Saano V, Nyman L: Characterization of the selectivity, specificity and potency of medetomidine as an  $\alpha_2$ -adrenoceptor agonist. *Eur J Pharmacol* 150:9-14, 1988
- Doze VA, Chen BX, Maze M: Dexmedetomidine produces a hypnotic-anesthetic action in rats via activation of central  $\alpha_2$ -adrenoceptors. *ANESTHESIOLOGY* 71:75-79, 1989
- Dundee JW, Hassard TH, McGowan WAW, Henshaw J: The "induction" dose of thiopentone. A method of study and preliminary illustrative results. *Anaesthesia* 37:1176-1184, 1982
- Hannington-Kiff JG: Measurement of recovery from outpatient general anaesthesia with a simple ocular test. *Br Med J* 3:132-135, 1970
- Smith JM, Misiak H: Critical flicker frequency (CFF) and psychotropic drugs in normal human subjects—A review. *Psychopharmacology* 47:175-182, 1976
- Maxwell C: Sensitivity and accuracy of the visual analogue scale: A psycho-physical classroom experiment. *Br J Clin Pharmacol* 6:15-24, 1978
- Scheinin M, Koulou M, Laurikainen E, Allonen H: Hypokalaemia and other non-bronchial effects of inhaled fenoterol and salbutamol: a placebo-controlled dose-response study in healthy volunteers. *Br J Clin Pharmacol* 24:645-653, 1987
- Scheinin M, Kallio A, Koulou M, Arstila M, Viikari J, Scheinin H: Dose-finding and tolerability study of medetomidine in four healthy volunteers. *Cur Ther Res* 41:637-646, 1987
- Kallio A, Scheinin M, Koulou M, Ponkilainen R, Ruskoaho H, Viinamäki O, Scheinin H: Effects of dexmedetomidine, a selective  $\alpha_2$ -adrenoceptor agonist, on hemodynamic control mechanisms. *Clin Pharmacol Ther* 46:33-42, 1989
- Miller RD, Way WL, Eger EI II: Effect of alphamethyl-dopa, reserpine, guanethidine and iproniazid on minimum alveolar anesthetic concentration (MAC). *ANESTHESIOLOGY* 29:1153-1158, 1968
- Mueller RA, Smith RD, Spruill WA, Breese GR: Central monoaminergic neuronal effects on minimum alveolar concentrations (MAC) of halothane and cyclopropane in rats. *ANESTHESIOLOGY* 42:142-153, 1975
- Roizen MF, White PF, Eger EI II, Brownstein M: Effects of ablation of serotonin or norepinephrine brain-stem areas on halothane and cyclopropane MAC's in rats. *ANESTHESIOLOGY* 49:252-255, 1978
- Flacke JW, Bloor BC, Flacke WE, Wong D, Dazza S, Stead SW, Laks H: Reduced narcotic requirement by clonidine with improved hemodynamic and adrenergic stability in patients undergoing coronary bypass surgery. *ANESTHESIOLOGY* 67:11-19, 1987
- Derbyshire DR, Chmielewski A, Fell D, Vater M, Achola K, Smith G: Plasma catecholamine responses to tracheal intubation. *Br J Anaesth* 55:855-860, 1983
- Oyama T, Wakayama S: The endocrine responses to general anesthesia. *Int Anesthesiol Clin* 26:176-181, 1988
- Grossman A, Weerasuriya K, Al-Damluji S, Turner P, Besser GM:  $\alpha_2$ -adrenoceptor agonists stimulate growth hormone secretion but have no acute effects on plasma cortisol under basal conditions. *Hormone Res* 25:65-71, 1987
- Kallio A, Koulou M, Scheinin H, Viikari J, Scheinin M: Acute effects of medetomidine, a selective  $\alpha_2$ -adrenoceptor agonist, on anterior pituitary hormone and cortisol secretion in man. *Acta Endocrinol* 119:11-15, 1988
- Viinamäki O, Kanto J, Grönroos M, Liukko P: Hormone response in gynecologic surgery. *Int J Clin Pharmacol Ther Toxicol* 21:355-358, 1983
- Noel GL, Suh HK, Stone JG, Frantz AG: Human prolactin and growth hormone release during surgery and other conditions of stress. *J Clin Endocrinol Metab* 35:840-851, 1972
- Karhuvaara S, Kallio A, Koulou M, Scheinin H, Scheinin M: No involvement of  $\alpha_2$ -adrenoceptors in the regulation of basal prolactin secretion in healthy men. *Psychoneuroendocrinology* 15:125-129, 1990
- Grant IS, Mackenzie N: Recovery following propofol (Diprivan) anaesthesia - a review of three different anaesthetic techniques. *Postgrad Med J* 61 Suppl 3:133-137, 1985
